# Supplementary material for: Multicenter study on caries risk assessment in adults using survival Classification and Regression Trees
Source: PubMed Central journal article supplement (PMC4933980; doi:10.1038/srep29190), 2016-07-06
Supplement: srep29190-s1.pdf [file srep29190-s1.pdf]

## Multicenter study on caries risk assessment in adults using survival Classification and Regression Trees

Masumi Arino, Ataru Ito, Shozo Fujiki, Seiichi Sugiyama, Mikako Hayashi

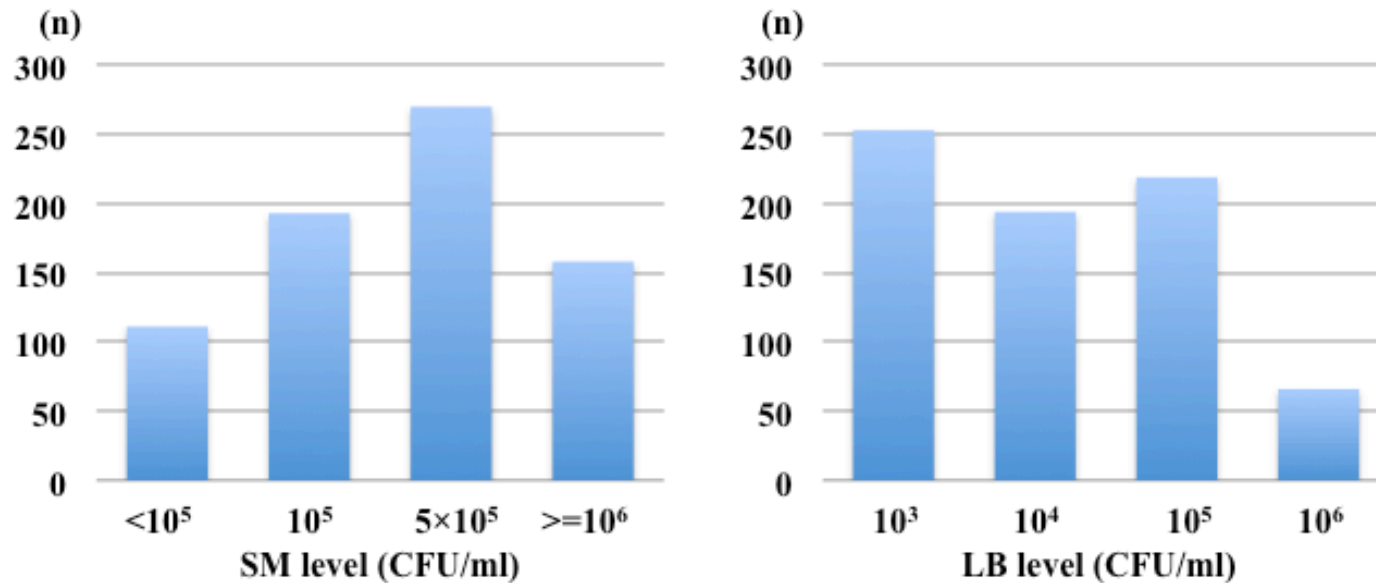

**Appendix 1:** Patient distribution according to levels of *mutans streptococci* (SM) and *Lactobacilli* (LB).
