# Supplementary material for: Multicenter study on caries risk assessment in adults using survival Classification and Regression Trees
Source: PubMed Central journal article supplement (PMC4933980; doi:10.1038/srep29190), 2016-07-06
Supplement: srep29190-s2.pdf [file srep29190-s2.pdf]

**Multicenter study on caries risk assessment in adults using survival Classification and Regression Trees**

**Masumi Arino, Ataru Ito, Shozo Fujiki, Seiichi Sugiyama, Mikako Hayashi**

**Appendix 2:** Caries risk of patients assessed by combination of levels of cariogenic bacteria and compliance with the preventive program, by Cox hazard model.

|                                     | n   | Primary caries        |          | Secondary caries      |          |
|-------------------------------------|-----|-----------------------|----------|-----------------------|----------|
|                                     |     | Hazard ratio (95% CI) | p-value  | Hazard ratio (95% CI) | p-value  |
| SM: low level,<br>Compliance: good  | 366 | 1.00<br>(-)           | -        | 1.00<br>(-)           | -        |
| SM: high level,<br>Compliance: good | 96  | 1.96<br>(0.98-3.71)   | 0.0560   | 2.41<br>(1.41-4.03)   | 0.0017*  |
| SM: low level,<br>Compliance: poor  | 208 | 2.19<br>(1.16-4.00)   | 0.0160*  | 1.27<br>(0.66-2.30)   | 0.4646   |
| SM: high level,<br>Compliance: poor | 62  | 4.73<br>(2.40-8.90)   | <0.0001* | 3.63<br>(1.89-6.56)   | 0.0003*  |
| LB: low level,<br>Compliance: good  | 168 | 1.00<br>(-)           | -        | 1.00<br>(-)           | -        |
| LB: high level,<br>Compliance: good | 294 | 1.58<br>(0.30-1.23)   | 0.1831   | 4.00<br>(2.02-9.11)   | <0.0001* |
| LB: low level,<br>Compliance: poor  | 85  | 3.10<br>(1.18-7.77)   | 0.0224*  | 1.90<br>(0.41-6.69)   | 0.3747   |
| LB: high level,<br>Compliance: poor | 185 | 3.75<br>(1.85-8.07)   | 0.0002*  | 6.09<br>(2.84-14.5)   | <0.0001* |

SM: high level = higher than  $1 \times 10^6$  CFU/ml, low level =  $1 \times 10^6$  CFU/ml or lower

LB: high level = higher than  $1 \times 10^4$  CFU/ml, low level =  $1 \times 10^4$  CFU/ml or lower

Each patient's compliance with the preventive program was categorized as follows:

good = regular visits and sometimes delayed visits, poor = irregular visits and emergency visits only

\*Statistically significant at a level of  $p < 0.05$
